# Supplementary material for: Hyainailourine and teratodontine cranial material from the late Eocene of Egypt and the application of parsimony and Bayesian methods to the phylogeny and biogeography of Hyaenodonta (Placentalia, Mammalia)
Source: PeerJ. 2016 Nov 10;4:e2639. doi: 10.7717/peerj.2639 (PMC5111901; doi:10.7717/peerj.2639)
Supplement: Supplemental Information 3 — Node code corresponds to Figs. 19 and 22. Left portion of chart refers to nodes and clades, right portion of chart (three columns) refers to terminal taxon branch rates and are listed in alphabetical order by taxon. Median age expressed in Ma; Median relative rate expressed in relative % change/Ma compared to all branch rates; Posterior probability expressed as percentage; 95% conf., 95% confidence interval; Tip-dating age is age input for taxon for Bayesian tip-dating analysis. [file peerj-04-2639-s003.xlsx]

## Sheet: TipDating Statistics
		Mean Age (Ma)	Median Age (Ma)	Youngest Age estimate (Ma)	Oldest Age estimate (Ma)	Relative Mean Rate (% change/Ma)	Median Relative Rate (% change/Ma)	Absolute Mean Rate (% change/Ma)	Absolute Median Relative Rate (% change/Ma)	Posterior probability	Terminal branch	Mean Age (Ma)	Median Age (Ma)	Youngest Age estimate (Ma)	Oldest Age estimate (Ma)	Absolute Mean Rate (% character change/Ma)	Absolute Median Rate (% character change/Ma)	Relative Mean Rate (% change/Ma)	Relative Median Relative Rate (% change/Ma)
T1	Hyaenodonta	73.4545	73.5844	69.5665	77.3684	1.0753	0.9825	1.17843	1.16172	1	Akhnatenavus leptognathus	33.7993	33.9545	30.8802	36.4746	1.65548	1.42267	1.5106	1.2032
T2	Proviverra+Arfia clade	72.2323	72.2931	67.7259	76.454	0.7888	0.2304	0.864451	0.272427	0.043	Akhnatenavus nefertiticyon	34.4491	34.603	31.3092	37.2047	0.950699	0.737705	0.8675	0.6239
T3	Sinopa+Arfia clade	70.7204	70.8715	65.6743	75.7553	1.1504	0.5496	1.26073	0.649852	0.1099	Allopterodon torvidus	42.7008	42.8567	11.6761	11.6761	0.822259	0.792687	0.7503	0.6704
T4	Arfia+Limnocyoninae clade	67.4424	67.4641	61.5795	73.2782	1.6154	1.1556	1.77033	1.36639	0.4186	Anasinopa leakeyi	16.4839	16.5961	12.9743	19.7998	0.750587	0.743381	0.6849	0.6287
T5	Arfia clade	60.1823	60.1023	54.9161	65.4386	1.9279	1.6324	2.1128	1.93016	1	Apterodon gaudryi	31.7531	31.8933	28.5351	34.7295	1.12309	0.945691	1.0248	0.7998
T6	A. shoshoniensis+A. opisthotoma	56.8149	56.8329	52.3957	61.1984	1.2897	0.8816	1.41339	1.04241	0.8104	Apterodon langebadrae	34.0835	33.9204	28.7078	39.4086	1.20933	0.878766	1.1035	0.7432
T7	Limnocyoninae	60.0003	59.8191	54.212	65.6758	1.284	1.1035	1.40714	1.30479	0.9881	Apterodon macrognathus	33.8005	33.954	30.8863	36.4829	1.22314	1.12388	1.1161	0.9505
T8	Prolimnocyon+	55.6889	55.6284	50.3989	60.8515	0.9813	0.7207	1.07541	0.852162	0.4637	Arfia gingerichi	55.4999	55.6519	52.5474	58.1425	1.43783	0.944508	1.312	0.7988
T9	Limnocyon+Thinocyon	53.0535	52.8777	47.2096	58.8948	1.3972	0.9843	1.5312	1.16385	0.9873	Arfia opisthotoma	53.9422	54.0769	50.6117	56.9968	1.51213	1.14611	1.3798	0.9693
T10	Prototomus minimus+	63.1701	63.0997	56.2144	70.8312	1.4144	1.166	1.55005	1.37869	0.873	Arfia shoshoniensis	54.0724	54.2102	50.8645	57.2165	0.521213	0.389367	0.4756	0.3293
T11	Prototomus phobos+	59.9992	59.8979	52.3672	67.4526	0.9873	0.6718	1.08199	0.794342	0.3852	Boualitomus marocanensis	54.9539	55.0967	51.7098	57.9417	0.825876	0.797417	0.7536	0.6744
T12	Sinopa	52.5501	52.3343	46.1736	59.0609	1.2227	1.0317	1.33997	1.21989	0.9873	Boritia duffaudi	52.4603	52.5673	48.8776	55.8904	1.62709	1.4961	1.4847	1.2653
T13	Allopterodon+	65.9841	66.0316	58.6982	72.7989	1.2356	0.9676	1.3541	1.1441	0.2754	Brychotherium ephalmos	34.4368	34.5912	31.325	37.2133	1.83389	1.5188	1.6734	1.2845
T14	Lesmesodon+Proviverra clade	65.8473	65.8917	57.755	74.0341	1.1307	0.8263	1.23914	0.977025	0.2496	Cynohyaenodon cayluxi	44.1277	44.7055	36.8012	50.2912	0.8033	0.803447	0.733	0.6795
T15	Lesmesodon+Parvagula	53.797	53.442	46.8547	61.2195	1.1568	0.9419	1.26775	1.11371	0.4722	Altacreodus magnus	67.4295	67.4692	63.1506	71.6216	0.938316	0.75284	0.8562	0.6367
T16	Morlodon+	61.827	61.6159	54.045	69.9741	0.9745	0.6608	1.06796	0.781336	0.139	Dissopsalis pyroclasticus	11.6789	11.6761	11.6761	11.6761	1.45591	1.44904	1.3285	1.2255
T17	Eoproviverra+Proviverra	56.997	56.5733	48.8835	65.7517	1.2919	0.9546	1.4158	1.12873	0.4437	Eomaia scansoria	124.181	124.171	119.46	128.598	0.491514	0.176179	0.4485	0.149
T18	Hyaenodontidae+Hyainailourinae	72.2411	72.3402	68.1306	76.2511	9.4321	6.0742	10.3367	7.18219	0.0871	Eoproviverra eisenmanni	51.6552	51.5675	46.6757	56.9076	1.97976	1.54588	1.8065	1.3074
T19	Preregidens+	67.3319	67.4259	61.5361	72.9122	3.7496	2.5516	4.10921	3.01703	0.1527	Eurotherium matthesi	45.0682	45.1547	39.8374	50.1915	0.445815	0.270653	0.4068	0.2289
T20	Quercytherium+	66.2205	66.3268	60.1983	72.3716	2.9039	1.9474	3.1824	2.30262	0.2318	Eurotherium theriodis	43.4311	43.3359	38.1584	48.4548	1.68616	1.28079	1.5386	1.0832
T21	Quercytherium	43.1277	42.9318	36.2127	50.2933	1.2012	1.092	1.3164	1.29119	0.9995	Furodon crocheti	47.3724	47.4677	43.5263	50.9897	2.03674	1.8714	1.8585	1.5827
T22	Cynohyaenodon+	65.541	65.6325	59.2426	71.6259	2.1431	1.4087	2.34864	1.66566	0.1837	Galecyon chronius	51.709	51.8272	48.2312	55.0486	0.988618	0.962126	0.9021	0.8137
T23	Eurotherium clade+	63.8617	63.9103	57.2724	70.1679	2.244	1.4395	2.45922	1.70208	0.2268	Galecyon mordax	54.2083	54.3514	50.7874	57.4183	1.16933	1.01734	1.067	0.8604
T24	Leonhardtina+	55.5968	55.434	47.8385	63.88	0.9033	0.7345	0.989933	0.868479	0.5562	Galecyon morloi	55.4999	55.6519	52.5587	58.1542	1.08352	0.916249	0.9887	0.7749
T25	Eurotherium	47.586	47.5628	41.8937	53.154	1.5823	1.273	1.73405	1.50521	0.9973	Galecyon peregrinus	54.2257	54.3506	50.7894	57.417	1.08692	0.963663	0.9918	0.815
T26	Matthodon+	60.9558	60.9469	54.2769	67.8354	4.3296	3.0049	4.74484	3.55302	0.5406	Gazinocyon vulpeculus	51.6582	51.7766	48.1623	55.0019	1.34698	1.3658	1.2291	1.1551
T27	Oxyaenoides+	57.6637	57.5962	51.2016	64.3359	4.3836	3.2114	4.80402	3.79719	0.9727	Glibzegdouia tabelbalaensis	47.3537	47.4501	43.5471	51.0321	1.72298	1.37384	1.5722	1.1619
T28	Oxyaenoides	53.0092	52.8879	47.7134	58.4083	1.9181	1.3866	2.10206	1.63953	0.8872	Hemipsalodon grandis	39.3236	39.4282	35.6441	42.939	2.10107	1.77858	1.9172	1.5042
T29	Hyaenodontinae	50.7422	50.6283	45.0353	56.6606	2.9256	2.251	3.20619	2.6616	0.9957	Hyaenodon horridus	35.0952	35.1719	30.8851	38.8995	1.29613	0.962126	1.1827	0.8137
T30	Propterodon tongi+	47.5599	47.4885	42.3186	52.7891	1.8023	1.2152	1.97515	1.43686	0.6493	Ergiliyn Dzo Hyaenodon	33.0232	33.1632	29.7529	36.1388	1.03366	0.805575	0.9432	0.6813
T31	Ergiliyn Dzo Hyaenodon+	40.871	40.8535	35.7841	45.9738	2.0152	1.728	2.20847	2.0432	1	Hyaenodon minor	35.3852	35.4965	31.6674	38.8974	1.26764	0.957278	1.1567	0.8096
T32	H. neimongoliensis+	38.8806	38.9017	34.1973	43.1684	1.5751	0.9964	1.72616	1.17815	0.5725	Hyaenodon neimongoliensis	29.9731	30.2911	23.6876	35.7705	0.807026	0.751776	0.7364	0.6358
T33	H. horridus+H. minor	37.9238	37.9533	33.2901	41.947	1.081	0.5787	1.18468	0.68426	0.3303	Hyainailouros sulzeri	16.458	16.5705	12.8352	19.8425	1.22895	1.16302	1.1214	0.9836
T34	Galecyon clade+Hyainailouroidea	71.4752	71.5153	67.0859	75.8075	4.3386	2.1103	4.7547	2.49524	0.0276	Indohyaenodon raoi	54.5	54.6526	51.6212	57.1753	1.15585	1.11229	1.0547	0.9407
T35	Pyrocyon+Galecyon	69.1545	69.254	63.6931	74.3023	1.4268	0.7526	1.56364	0.889881	0.0551	Isohyaenodon pilgrimi	17.3216	17.3777	13.083	21.5238	1.28024	1.17792	1.1682	0.9962
T36	Gazinocyon+Pyrocyon	65.2641	65.4131	57.9142	72.437	1.0376	0.7559	1.13711	0.893783	0.2173	Kerberos langebadrae	38.7613	38.885	35.1287	42.2864	1.41328	1.26707	1.2896	1.0716
T37	Boritia+	64.4532	64.3884	58.8338	70.5111	1.9157	1.4588	2.09943	1.7249	0.3558	Koholia atlasense	51.3947	51.5466	48.3477	54.1053	1.52145	1.21563	1.3883	1.0281
T38	G. morloi+	62.5824	62.5419	57.2088	68.1375	1.5806	1.2539	1.73219	1.48262	0.6425	Kyawdawia lupina	38.5052	38.6061	34.8222	42.0971	1.07015	0.996653	0.9765	0.8429
T39	G. peregrinus+	60.7123	60.655	55.2396	66.0881	0.8242	0.4701	0.903247	0.55585	0.3194	Lahimia selloumi	60.2383	60.3764	56.7257	63.375	2.99259	2.22683	2.7307	1.8833
T40	G. mordax+G. chronius	58.6202	58.5412	53.172	63.9393	0.8656	0.569	0.948617	0.672791	0.3929	Leakitherium hiwegi	16.7699	16.8131	12.6395	20.9916	0.700723	0.945218	0.6394	0.7994
T41	Lahimia+Hyainailouroidea	70.4467	70.573	65.5144	74.9022	3.2161	1.4608	3.52455	1.72726	0.0694	Lesmesodon spp.	45.605	45.7709	40.3725	50.7141	0.806368	0.767856	0.7358	0.6494
T42	Boualitomus+Lahimia	63.8625	63.7858	58.6855	69.1281	2.9269	2.3163	3.20761	2.73881	0.9827	Limnocyon verus	48.2259	48.317	44.2258	51.97	1.13799	0.970994	1.0384	0.8212
T43	Hyainailouroidea	68.5867	68.708	63.2971	73.9137	4.2954	2.8092	4.70736	3.32162	0.3301	Leonhardtina gracilis	45.8685	46.0513	40.7127	50.7785	0.673544	0.654936	0.6146	0.5539
T44	Furodon+	60.0651	60.0338	51.8826	68.231	1.7848	1.3736	1.95597	1.62416	0.3873	Maelestes gobiensis	73.3659	73.4537	69.5285	77.0797	0.503131	0.477693	0.4591	0.404
T45	Glibzegdouia+	53.8339	53.4546	46.0076	61.9507	1.305	1.0941	1.43016	1.29367	0.6932	Masrasector aegypticum	30.7982	30.9561	27.7897	33.4342	1.23717	0.926417	1.1289	0.7835
T46	Brychotherium+	45.7518	45.476	37.5732	54.3392	0.9656	0.7937	1.05821	0.938478	0.6692	Masrasector ligabuei	31.6796	31.8072	28.2268	34.8619	0.969549	0.638146	0.8847	0.5397
T47	Dissopsalis+Masrasector	40.1914	39.888	32.1168	48.571	0.7641	0.6348	0.837383	0.750593	0.5711	Matthodon tritens	44.513	44.5185	39.0733	50.0119	1.50369	1.41724	1.3721	1.1986
T48	Teratodon+	36.7729	36.3637	30.0685	43.9332	1.121	0.8292	1.22851	0.980454	0.2506	Megistotherium osteothlastes	16.3854	16.4973	12.8507	19.7437	1.09065	0.945218	0.9952	0.7994
T49	Masrasector	33.6942	33.5337	28.5264	38.7213	1.3013	0.9217	1.4261	1.08983	0.4543	Metapterodon kaiseri	17.4861	17.5245	13.2186	21.686	1.17514	1.21161	1.0723	1.0247
T50	Dissopsalis+Anasinopa	28.4204	28.1834	19.0889	37.7742	0.7381	0.6108	0.808889	0.722215	0.6701	Metasinopa fraasi	31.5957	31.7166	28.0916	35.0683	0.867301	0.89804	0.7914	0.7595
T51	Indohyaenodon+	66.7934	66.9014	60.9361	72.4737	3.094	2.1476	3.39074	2.53934	0.2063	Morlodon vellerei	52.3092	52.3287	11.6761	11.6761	1.2204	1.08155	1.1136	0.9147
T52	Koholia+Hyainailouroidea	64.5647	64.6239	58.3732	70.9694	2.1704	1.4834	2.37856	1.75399	0.1456	Orienspterodon dahkoensis	40.5974	40.7102	36.9837	43.9769	1.0536	0.97868	0.9614	0.8277
T53	Tritemnodon+Koholia	56.9214	56.5629	49.8612	63.9015	1.2256	1.0707	1.34314	1.26601	0.6877	Oxyaenoides bicuspidens	45.1811	45.2979	39.8863	50.4643	1.0044	0.954795	0.9165	0.8075
T54	Kyawdawia clade+	60.3266	60.3782	53.2389	67.6626	2.3115	1.6511	2.53319	1.95228	0.3197	Oxyaenoides lindgreni	49.6745	49.8033	46.2461	52.8772	1.85997	1.32087	1.6972	1.1171
T55	Kyawdawia+	52.383	52.0631	45.1979	60.0708	0.9889	0.8583	1.08374	1.01486	0.8836	Paratritemnodon indicus	46.4701	46.5303	42.3693	50.4432	1.06456	0.702233	0.9714	0.5939
T56	Paratritemnodon+Metasinopa	48.8038	48.6422	43.4591	54.4689	1.2244	0.8822	1.34183	1.04312	0.5568	Paroxyaena spp.	38.4873	38.6012	34.7984	41.8904	3.45441	2.79179	3.1521	2.3611
T57	Hyainailouridae	55.7321	55.5879	48.2487	63.2914	2.9175	2.1871	3.19731	2.58605	0.7975	Parvagula palulae	51.3928	51.2829	45.9689	56.997	1.25174	1.05081	1.1422	0.8887
T58	Apterodontinae	45.2089	44.9389	37.2749	53.3939	1.3039	1.0575	1.42895	1.2504	0.9876	Preregidens langebadrae	52.081	52.0777	47.1521	57.2672	1.55838	1.48865	1.422	1.259
T59	Apterodon	41.2543	41.1345	34.9173	47.7315	1.3026	0.9297	1.42753	1.09929	0.6848	Prolimnocyon atavus	51.6801	51.7975	48.1481	55.0704	0.616229	0.583992	0.5623	0.4939
T60	A. gaudryi + A. langebadrae	37.1846	37.0989	31.2928	42.9776	1.2743	0.9311	1.39651	1.10094	0.9725	Prolimnocyon chowi	56.1498	56.3008	52.9827	59.1959	0.498638	0.244759	0.455	0.207
T61	Orienspterodon+	52.1462	51.9783	45.5271	59.2277	2.5513	1.7507	2.79599	2.07004	0.6659	Propterodon tongi	44.4707	44.5888	40.8667	47.8925	1.03081	0.795525	0.9406	0.6728
T62	Kerberos+Megistotheirum clade	48.5996	48.5188	42.9356	54.4997	3.1483	2.2085	3.45024	2.61135	0.9502	Propterodon morrisi	44.4365	44.5525	40.9073	47.9527	1.7574	1.40884	1.6036	1.1915
T63	Kerberos+	44.3076	44.2142	38.4779	50.0393	0.9356	0.6263	1.02533	0.740543	0.2132	Proviverra typica	43.909	43.9573	39.925	48.1785	0.833437	0.816453	0.7605	0.6905
T64	Pterodon+Metapterodon	39.8002	39.5719	33.5445	46.4258	0.81	0.6434	0.887685	0.760762	0.4918	Prototomus minimus	52.7615	52.8362	47.7356	57.6187	0.949713	0.865523	0.8666	0.732
T65	Hemipsalodon+	46.1314	46.0879	40.7531	51.5819	1.4381	0.7876	1.57602	0.931265	0.1782	Prototomus phobos	50.5755	50.6041	44.8685	56.3862	1.3609	1.26683	1.2418	1.0714
T66	Akhnatenavus+	44.5785	44.5231	39.35	49.7805	1.6937	1.0519	1.85614	1.24378	0.2081	“Pterodon” africanus	33.8001	33.9528	30.8911	36.4833	1.01021	0.897803	0.9218	0.7593
T67	Akhnatenavus	37.8035	37.711	32.637	42.6815	1.6456	1.2707	1.80342	1.50249	0.9441	Pterodon dasyuroides	35.6721	35.7703	32.0434	39.247	0.741381	0.627977	0.6765	0.5311
T68	Paroxyaena spp.+	43.427	43.396	38.4246	48.7916	1.09	0.6583	1.19454	0.77838	0.2026	“Pterodon” phiomensis	33.7991	33.9536	30.8716	36.4676	1.13525	0.954795	1.0359	0.8075
T69	"Pterodon" africanus+	40.3974	40.3365	34.8725	45.6076	0.7067	0.4857	0.774477	0.574296	0.3179	Pyrocyon strenuus	53.2699	53.2928	48.9158	57.6642	1.11519	1.11856	1.0176	0.946
T70	"Pterodon" phiomensis+	37.7796	37.6479	32.3948	43.1009	0.7733	0.5456	0.847465	0.645122	0.3159	Quasiapterodon minutus	29.6017	29.7577	26.54	32.3005	1.11728	1.1026	1.0195	0.9325
T71	Megistotherium+Isohyaenodon	28.5348	28.4889	22.2327	34.8837	0.8803	0.7921	0.964727	0.936586	0.9909	Quercytherium simplicidens	35.64	35.7388	32.0466	39.2344	0.972727	0.882432	0.8876	0.7463
T72	Hyainailouros+Isohyaenodon	24.0749	24.0087	18.0344	30.4877	1.0937	0.7829	1.19859	0.925708	0.5804	Quercytherium tenebrosum	36.6912	36.6868	31.9729	41.3146	1.59191	1.33589	1.4526	1.1298
T73	Megistotherium + Leakitherium	22.2505	22.0916	16.0676	28.7122	0.7127	0.5643	0.781053	0.667233	0.6877	Sinopa grangeri	47.9446	48.0209	43.978	51.7685	1.93406	1.51526	1.7648	1.2815
T74	Tinerhodon clade+	106.037	106.064	87.2079	125.096	0.4075	0.3677	0.446582	0.434772	1	Sinopa jilinia	43.9581	44.317	39.6165	48.3	0.718257	0.687807	0.6554	0.5817
T75	Maelestes+	85.6322	84.9923	74.1908	98.0117	0.4317	0.4049	0.473103	0.478757	0.8049	Teratodon spp.	17.6501	17.6887	13.4672	21.904	0.948179	0.950539	0.8652	0.8039
T76	Altacreodus + Tinerhodon	72.9976	72.4318	64.8244	81.8851	0.8211	0.7186	0.899849	0.849679	0.9429	Tinerhodon	56.1545	56.3102	53.1011	58.8239	0.778532	0.796116	0.7104	0.6733
T77	Eomaia+	125.683	125.638	120.748	130.619					1	Thinocyon velox	48.1795	48.2659	44.2655	52.0156	1.33832	1.08616	1.2212	0.9186
											Tritemnodon agilis	48.4381	48.5174	44.6105	52.3316	0.94259	0.922516	0.8601	0.7802
Node code corresponds to Figs. 19 and 22. Left portion of chart refers to nodes and clades, right portion of chart refers to terminal taxon branch rates and are listed in alphabetical order by taxon. Age expressed in Ma; Youngest and oldeast estimated ages bracket the 95% confidence interval; Median relative rate expressed in relative % change/Ma compared to all branch rates; absolute branch rate…
