# Supplementary material for: Hyainailourine and teratodontine cranial material from the late Eocene of Egypt and the application of parsimony and Bayesian methods to the phylogeny and biogeography of Hyaenodonta (Placentalia, Mammalia)
Source: PeerJ. 2016 Nov 10;4:e2639. doi: 10.7717/peerj.2639 (PMC5111901; doi:10.7717/peerj.2639)
Supplement: Supplemental Information 4 — Continental origins reconstructed for each node on maximum parsimony strict consensus topology. Left column P# values correspond to node code in Fig. 20. Clade name is a shorthand for identifying the node. Af, Afro-Arabia; As, Asia; E, Europe; NA, North America. Parsimony, parsimony optimization analysis; Likelihood, likelihood optimization analysis (values represent % likelihood); BBM, Bayesian Binary MCMC analysis (values represent % likelihood). [file peerj-04-2639-s004.xlsx]

## Sheet: Strict Biogeography
Parsimony Topology Biogeography
Node Code	Clade Name	Parsimony	Afro-Arabia Likelihood	Asia Likelihood	Europe Likelihood	NA Likelihood	Afro-Arabia BBM	Asia BBM	Europe BBM	NA BBM
P1	Hyaenodonta	E	1.814	3.3925	92.936	1.856	0.02	0.22	99.73	0.03
P2	Morlodon +	E	0.289	0.4235	98.9165	0.3705	0	0.01	99.98	0.01
P3	Lesmesodon/Hyaenodontidae +	E	0.0706	0.094144	99.3661	0.4691	0	0.01	99.93	0.06
P4	Proviverra+	E	0.0998	0.101	99.665	0.133	0	0	100	0
P5	Allopterodon+	E	0.101	0.101	99.693	0.1039	0	0	100	0
P6	Eurotherium clade+	E	0.11149	0.1115	99.665	0.11175	0	0	100	0
P7	Leonhardtina+	E	0.09966	0.09967	99.7009	0.09969	0	0	100	0
P8	Eurotherium	E	0.089	0.089	99.733	0.08901	0	0	100	0
P9	Cynohyaenodon+	E	0.101	0.102	99.694	0.101	0	0	100	0
P10	Quercytherium+	E	0.11	0.111	99.668	0.1105	0	0	100	0
P11	Quercytherium	E	0.09005	0.0901	99.7297	0.09006	0	0	100	0
P12	Preregidens+	E	0.101	0.108	99.688	0.101	0	0	100	0
P13	Matthodon+	E	0.105	0.17578	99.6144	0.1049	0	0	100	0
P14	Oxyaenoides clade+	E	0.0877	0.932	98.8917	0.08815	0	0.07	99.93	0
P15	Hyaenodontinae	As	0.001	0.981	0.02	0.001	0.03	96.68	3.27	0.02
P16	Hyaenodon	As	0.305	97.054	1.655	0.984	0.01	99.88	0.08	0.03
P17	H. horridus+H. minor+H. neimongoliensis	As	0.793	81.5722	9.0721	8.5622	0.03	98.97	0.57	0.43
P18	Arfia+	NA	1.3988	1.93	22.316	74.5539	0.03	0.05	12.28	87.64
P19	Arfia	NA	0.63	0.75566	11.7013	86.91	0.01	0.01	1.39	98.58
P20	A. gingerichi+A. shosoniensis	NA	0.927	0.964	18.0201	80.0878	0.04	0.04	6.32	93.6
P21	Sinopa clade+	NA	0.951	3.638	7.7397	87.669	0.02	0.11	0.58	99.29
P22	Sinopa	NA	1.1797	13.1449	3.182	82.492	0.05	1.2	0.38	98.37
P23	Prototomus phobos +	NA	0.7001	1.05	5.419	92.829	0	0.01	0.33	99.66
P24	Prototomus minimus +	NA	2.099	1.216	15.08	81.6055	0.03	0.03	2.76	97.18
P25	Limnocyoninae Galecyon polytomy	NA	3.876	0.376	2.427	93.3205	0.01	0.01	0.28	99.7
P26	Limnocyoninae	NA	0.5553	0.27	0.37	98.8	0	0	0	100
P27	Limnocyon +	NA	0.3938	1.1485	0.27	98.5	0	0	0	99.99
P28	Prolimnocyon	NA	0.3938	1.14849	0.38376	98.0739	0.01	0.29	0.02	99.68
P29	Galecyon clade	NA	0.2932	0.9597	0.27	98.476	0	0	0.08	99.92
P30	G. chronius/mordax+G. morloi/Boritia/Parvagula	NA	1.11	0.922	10.035	87.9328	0.01	0.01	0.91	99.07
P31	G. chronius + G. mordax	NA	0.284	0.2602	1.0883	98.67	0	0	0.03	99.97
P32	G. morloi +	E	0.871	0.84477	90.4261	7.85808	0.01	0.02	97.86	2.1
P33	Boritia + Parvagula	E	0.871	0.844775	90.42	7.85808	0	0	99.99	0
P34	Hyainailouroidea polytomy	Af	99.7347	0.0171	0.001405	0.246695	0.51	0.2	0.33	98.95
P35	Metasinopa +	Af	99.705	0.092475	0.09115	0.111744	100	0	0	0
P36	Teratodontinae	Af	99.698	0.10003	0.099926	0.10167	100	0	0	0
P37	Teratodon/Glibzegdouia +	Af	99.698	0.100038	0.099926	0.10167	100	0	0	0
P38	Teratodon+Glibzegdouia	Af	99.729	0.09003	0.09003	0.09004	100	0	0	0
P39	Masrasector ligabuei +	Af	99.694	0.101	0.10166	0.101	100	0	0	0
P40	Brychotherium clade	Af	99.694	0.10166	0.10166	0.10168	100	0	0	0
P41	Brychotherium + Dissopsalis	Af	99.73	0.0899	0.0899	0.0899	100	0	0	0
P42	Anasinopa + Furodon	Af	99.73	0.0899	0.0899	0.0899	100	0	0	0
P43	Kyawdawia + Paratritemnodon	As	8.329	90.105	0.7737	0.79229	0.04	99.95	0	0.01
P44	Apterodontinae	Af	99.5899	0.11167	0.164	0.134	100	0	0	0
P45	Apterodon	Af	98.569	0.24322	0.9408	0.247	100	0	0	0
P46	A. gaudryi + A. langebadreae	Af	98.5688	0.24322	0.9409	0.24708	99.67	0.01	0.31	0.01
I	Hyainailourinae	Af	99.05	6.4e-05	0.08	0.007	88.73	0.21	5.09	5.97
P48	Akhnatenavus	Af	99.7486	0.08159	0.0876	0.082112	100	0	0	0
P49	Hyainailouros clade	Af	99.8969	0.007585	0.0879	0.007638	99.95	0	0.04	0
P50	Root	As	2.59557	90.885	3.9218	2.59729	0.11	99.66	0.16	0.08
P51	Maelestes+	As	3.1888	87.234	6.3832	3.193	0.45	98.16	1.07	0.32
P52	Tinerhodon clade+	Af, As, E, NA	37.3258	12.1902	13.134	37.349	7.69	48.22	37.23	6.87
P53	Tinerhodon+Altacreodus	Af, As, E, NA	37.325	12.1901	13.134	37.3492	47.89	2.97	6.05	43.09
Maximum parsimony biogeographic reconstructions. Continental origins reconstructed for each node on maximum parsimony strict consensus topology. Left column P# values correspond to node code in Fig. 16 and Fig. 20. Clade name is a shorthand for identifying the node. Af, Afro-Arabia; As, Asia; E, Europe; NA, North America. Parsimony, parsimony optimization analysis; Likelihood, likelihood optimiza…
