# Supplementary material for: Hyainailourine and teratodontine cranial material from the late Eocene of Egypt and the application of parsimony and Bayesian methods to the phylogeny and biogeography of Hyaenodonta (Placentalia, Mammalia)
Source: PeerJ. 2016 Nov 10;4:e2639. doi: 10.7717/peerj.2639 (PMC5111901; doi:10.7717/peerj.2639)
Supplement: Supplemental Information 6 — Continental origins reconstructed for each node on tip-dating Bayesian topology. Left column T# values correspond to node code in Fig. 22. Clade name is a shorthand for identifying the node. Af, Afro-Arabia; As, Asia; E, Europe; NA, North America. Parsimony, parsimony optimization analysis; Likelihood, likelihood optimization analysis (values represent % likelihood); BBM, Bayesian Binary MCMC analysis (values represent % likelihood). [file peerj-04-2639-s006.xlsx]

## Sheet: Table 7 Tip Dating Biogeography
Tip Dating Topology Biogeography
		Parsimony	Afro-Arabia Likelihood	Asia Likelihood	Europe Likelihood	NA Likelihood	Afro-Arabia BBM	Asia BBM	Europe BBM	NA BBM
T1	Hyaenodonta	E	3.5359	0.737556	79.2321	16.4944	0.16	3.91	95.51	0.42
T2	Proviverra+Arfia clade	E	1.77064	0.63319	80.2486	17.3476	0.03	0.25	99.23	0.49
T3	Sinopa+Arfia clade	E, NA	1.14905	1.19351	70.9038	26.7536	0.03	0.27	95	4.69
T4	Arfia+Limnocyoninae clade	E, NA	1.17798	4.18258	55.842	38.7974	0.09	1.17	76.11	22.63
T5	Arfia clade	E, NA	0.723017	1.25689	53.3688	44.6513	0.08	0.26	77.09	22.57
T6	A. shoshoniensis+A. opisthotoma	NA	0.080613	0.094205	1.42087	98.4043	0.01	0.01	1.35	98.64
T7	Limnocyoninae	As, E, NA	1.51094	33.0289	10.9836	54.4766	0.4	16.78	27.46	55.36
T8	Prolimnocyon+	NA	0.132967	1.12422	0.430885	98.3119	0.01	0.03	0.19	99.77
T9	Limnocyon+Thinocyon	NA	0.028131	0.113968	0.053929	99.804	0	0	0	99.99
T10	Prototomus minimus+	E, NA	1.34343	2.1683	58.6898	37.7985	0.04	0.23	96.24	3.48
T11	Prototomus phobos+	NA	1.37492	3.97442	21.0313	73.6193	0.05	0.57	8.71	90.68
T12	Sinopa	NA	1.31804	11.9915	5.95722	80.7333	0.2	6.59	1.91	91.31
T13	Allopterodon+	E	0.193589	0.140139	98.7407	0.925574	0	0.01	99.98	0
T14	Lesmesodon+Proviverra clade	E	0.171219	0.124972	98.8993	0.804559	0	0	100	0
T15	Lesmesodon+Parvagula	E	0.050376	0.049784	99.8414	0.058479	0	0	100	0
T16	Morlodon+	E	0.083301	0.076879	99.6686	0.171249	0	0	100	0
T17	Eoproviverra+Proviverra	E	0.085139	0.084274	99.7336	0.096979	0	0	100	0
T18	Hyaenodontidae+Hyainailourinae	E	5.2602	0.544479	78.5506	15.6447	0.44	0.34	98.95	0.27
T19	Preregidens+	E	0.42152	0.150741	98.3852	1.04257	0	0.02	99.98	0
T20	Quercytherium+	E	0.148517	0.074752	99.432	0.344723	0	0	100	0
T21	Quercytherium	E	0.263118	0.262086	99.2089	0.265864	0	0	100	0
T22	Cynohyaenodon+	E	0.087651	0.061874	99.6608	0.189678	0	0	100	0
T23	Eurotherium clade+	E	0.047911	0.091926	99.7821	0.078078	0	0	100	0
T24	Leonhardtina+	E	0.15372	0.157739	99.5321	0.156474	0	0	100	0
T25	Eurotherium	E	0.019273	0.019328	99.9421	0.019311	0	0	100	0
T26	Matthodon+	E	0.13382	0.675924	99.0443	0.14597	0	0.01	99.99	0
T27	Oxyaenoides+	E	0.324992	3.39798	95.9455	0.331552	0.01	0.39	99.59	0.01
T28	Oxyaenoides	E	0.054804	0.227413	99.6626	0.055173	0	0.02	99.98	0
T29	Hyaenodontinae	As	0.336374	95.2895	4.00029	0.373834	0.02	97.66	2.3	0.01
T30	Propterodon tongi+	As	0.072209	98.8753	0.904403	0.148041	0	99.99	0.01	0
T31	Ergiliyn Dzo Hyaenodon+	As	0.196348	95.811	2.32706	1.66556	0	99.99	0	0
T32	H. neimongoliensis+	As	0.338052	86.9979	6.92761	5.73642	0.01	99.85	0.07	0.06
T33	H. horridus+H. minor	As, E, NA	0.784053	50.4485	26.1362	22.6312	0.32	60.59	22.9	16.19
T34	Galecyon clade+Hyainailouroidea	E	16.3212	0.882444	63.659	19.1373	5.36	0.43	92.11	2.1
T35	Pyrocyon+Galecyon	E	5.91401	0.657629	54.5798	38.8485	0.35	0.16	88.96	10.52
T36	Gazinocyon+Pyrocyon	NA	3.30448	1.41396	20.8077	74.4739	0.01	0.01	1.45	98.53
T37	Boritia+	E	1.58526	0.448638	60.0803	37.8858	0.02	0.03	98.76	1.2
T38	G. morloi+	E	0.87579	0.36033	55.9686	42.7953	0.03	0.04	98.47	1.47
T39	G. peregrinus+	NA	0.21582	0.166695	5.46632	94.1512	0.01	0.01	2.64	97.34
T40	G. mordax+G. chronius	NA	0.065544	0.058405	0.828587	99.0475	0	0	0.02	99.98
T41	Lahimia+Hyainailouroidea	Af	70.6844	2.34662	19.9588	7.01019	98.01	0.24	1.67	0.08
T42	Boualitomus+Lahimia	Af	98.1023	0.27816	1.11882	0.500759	99.99	0	0	0
T43	Hyainailouroidea	Af	80.4406	5.86351	9.41966	4.2762	98.96	0.91	0.08	0.05
T44	Furodon+	Af	96.6013	1.06186	1.44685	0.890023	99.99	0	0	0
T45	Glibzegdouia+	Af	99.3884	0.197608	0.231498	0.182481	100	0	0	0
T46	Brychotherium+	Af	99.5363	0.15399	0.157127	0.152589	100	0	0	0
T47	Dissopsalis+Masrasector	Af	99.6911	0.102901	0.103285	0.102729	100	0	0	0
T48	Teratodon+	Af	99.8135	0.062149	0.062214	0.06212	100	0	0	0
T49	Masrasector	AF	99.989	0.003653	0.003654	0.003653	100	0	0	0
T50	Dissopsalis+Anasinopa	Af	98.2052	0.598256	0.598314	0.598231	100	0	0	0
T51	Indohyaenodon+	Af	77.0765	13.0334	6.11185	3.77823	83.86	15.91	0.07	0.16
T52	Koholia+Hyainailouroidea	Af	78.2914	13.3701	4.43133	3.90726	87.81	11.47	0.08	0.64
T53	Tritemnodon+Koholia	Af	81.0509	4.20558	2.08415	12.6593	92.64	1.97	0.16	5.24
T54	Kyawdawia clade+	Af	71.3475	21.8366	4.30514	2.51078	83.98	15.87	0.07	0.08
T55	Kyawdawia+	Af, As	14.5965	82.9907	1.29244	1.12037	33.04	66.87	0.04	0.04
T56	Paratritemnodon+Metasinopa	Af, As	10.852	87.873	0.666274	0.60881	49.12	50.72	0.08	0.08
T57	Hyainailouridae	Af	75.8772	16.1637	5.97331	1.98571	89.61	10.15	0.17	0.08
T58	Apterodontinae	Af	96.4688	1.55161	1.41834	0.561241	99.92	0.07	0.01	0
T59	Apterodon	Af	98.3438	0.340626	1.14354	0.172075	99.98	0	0.01	0
T60	A. gaudryi + A. langebadrae	Af	98.3438	0.340626	1.14354	0.172075	99.53	0.02	0.44	0.01
T61	Orienspterodon+	Af	67.1337	18.3032	11.7279	2.83517	64.33	33.49	1.7	0.47
T62	Kerberos+Megistotheirum clade	Af	66.1823	6.01577	23.6181	4.18386	69.74	7.59	19.22	3.45
T63	Kerberos+	Af, E	13.7785	1.20438	84.0295	0.987587	9.84	0.4	89.65	0.11
T64	Pterodon+Metapterodon	Af, E	10.4976	0.926688	87.7314	0.844267	14.22	0.28	85.34	0.16
T65	Hemipsalodon+	Af	74.2036	2.54251	16.297	6.95688	64.67	1.09	11.47	22.77
T66	Akhnatenavus+	Af	84.7928	0.627594	12.9865	1.59314	97.96	0.06	1.72	0.26
T67	Akhnatenavus	Af	99.5961	0.05267	0.280733	0.070487	99.99	0	0.01	0
T68	Paroxyaena spp.+	Af	84.6203	0.472877	13.8272	1.07963	93.79	0.15	5.91	0.15
T69	"Pterodon" africanus+	Af	98.57	0.094835	1.19321	0.141907	99.96	0	0.03	0
T70	"Pterodon" phiomensis+	Af	99.6087	0.045797	0.292076	0.053459	100	0	0	0
T71	Megistotherium+Isohyaenodon	Af	98.5166	0.206615	1.0694	0.207356	99.99	0	0	0
T72	Hyainailouros+Isohyaenodon	Af	93.1162	0.555432	5.77258	0.555735	99.65	0.01	0.33	0.01
T73	Megistotherium + Leakitherium	Af	99.7864	0.056733	0.100139	0.05677	100	0	0	0
T74	Tinerhodon clade+	As	10.6854	56.475	17.391	15.4487	1.54	79.75	16.77	1.93
T75	Maelestes+	As	9.86437	59.822	7.30545	23.0082	4.23	90.7	1.37	3.71
T76	Altacreodus + Tinerhodon	Af, As, NA	17.7904	13.5933	4.24851	64.3678	41.55	16.41	1.3	40.74
T77	Eomaia+	As	1.44037	95.2007	1.71998	1.63899	0.53	96.8	2.22	0.45
Continental origins reconstructed for each node on Bayesian tip-dating topology. Left column T# values correspond to node code in Fig. 19 and Fig. 22. Clade name is a shorthand for identifying the node. Af, Afro-Arabia; As, Asia; E, Europe; NA, North America. Parsimony, parsimony optimization analysis; Likelihood, likelihood optimization analysis (values represent % likelihood); BBM, Bayesian Bin…
